# Supplementary material for: Psychometric properties of the Norwegian version of the Kidscreen-27 questionnaire
Source: PubMed Central journal article supplement (PMC4826483; doi:10.1186/s12955-016-0460-4), 2016-04-09
Supplement: 12955_2016_460_MOESM1_ESM.pdf [file 12955_2016_460_MOESM1_ESM.pdf]

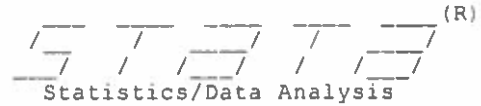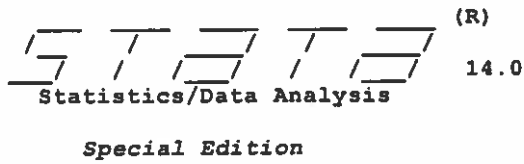

14.0 Copyright 1985-2015 StataCorp LP  
 StataCorp  
 4905 Lakeway Drive  
 College Station, Texas 77845 USA  
 800-STATA-PC <http://www.stata.com>  
 979-696-4600 [stata@stata.com](mailto:stata@stata.com)  
 979-696-4601 (fax)

40-user Stata network perpetual license:  
 Serial number: 401406001559  
 Licensed to: Helse Vest  
 Helse Vest

Notes:

1. Unicode is supported; see [help unicode](#) advice.
2. Maximum number of variables is set to 5000; see [help set maxvar](#).

```
1 . use "L:\JR.dta", clear

2 . sem (PHYSICAL -> KY27PHY1 KY27PHY2 KY27PHY3 KY27PHY4 KY27PHY5) (PSYCHOLOGICAL -> KY27PWB1 k
> Y27PWB7) (AUTONOMY -> KY27PAR1 KY27PAR2 KY27PAR3 KY27PAR4 KY27PAR5 KY27PAR6 KY27PAR7) (SOCI
> CHOOOL -> KY27SCH1 KY27SCH2 KY27SCH3 KY27SCH4), stand
note: The following observed variable names will be treated as latent variables: KY27PHYC, KC
PWmiss, KC27pw_T, KC27pa_R, PARMiss, KC27pa_T, KC27pe_R, PERmiss, KC27pe_T, KC27sc_R, S
intention use the nocapslatent option, or identify the latent variable names in the lat
(306 observations with missing values excluded)
```

Endogenous variables

Measurement: KY27PHY1 KY27PHY2 KY27PHY3 KY27PHY4 KY27PHY5 KY27PWB1 KY27PWB2 KY27PWB3 KY27PWE  
 KY27PAR2 KY27PAR3 KY27PAR4 KY27PAR5 KY27PAR6 KY27PAR7 KY27SOC1 KY27SOC2 KY27SOC  
 KY27SCH4

Exogenous variables

Latent: PHYSICAL PSYCHOLOGICAL AUTONOMY SOCIAL SCHOOL

Fitting target model:

```
Iteration 0: log likelihood = -29053.578
Iteration 1: log likelihood = -29019.1
Iteration 2: log likelihood = -29017.244
Iteration 3: log likelihood = -29017.224
Iteration 4: log likelihood = -29017.224
```

Structural equation model Number of obs = 938  
 Estimation method = ml  
 Log likelihood = -29017.224

- ( 1) [KY27PHY1]PHYSICAL = 1
- ( 2) [KY27PWB1]PSYCHOLOGICAL = 1
- ( 3) [KY27PAR1]AUTONOMY = 1
- ( 4) [KY27SOC1]SOCIAL = 1
- ( 5) [KY27SCH1]SCHOOL = 1

|                    | Standardized | Coef.    | OIM Std. Err. | z     | P> z  | [95% Conf. Interval] |          |
|--------------------|--------------|----------|---------------|-------|-------|----------------------|----------|
| <b>Measurement</b> |              |          |               |       |       |                      |          |
| KY27PHY1 <-        | PHYSICAL     | .5470555 | .0264973      | 20.65 | 0.000 | .4951218             | .5989892 |
|                    | _cons        | 4.094539 | .100014       | 40.94 | 0.000 | 3.898516             | 4.290563 |
| KY27PHY2 <-        | PHYSICAL     | .7458389 | .0192404      | 38.76 | 0.000 | .7081285             | .7835494 |
|                    | _cons        | 3.8748   | .0952331      | 40.69 | 0.000 | 3.688147             | 4.061453 |
| KY27PHY3 <-        | PHYSICAL     | .6392676 | .0232909      | 27.45 | 0.000 | .5936184             | .6849168 |

|             |               |          |          |       |       |          |          |
|-------------|---------------|----------|----------|-------|-------|----------|----------|
|             | _cons         | 3.639534 | .0901497 | 40.37 | 0.000 | 3.462844 | 3.816224 |
| ky27PHY4 <- | PHYSICAL      | .7021579 | .0208745 | 33.64 | 0.000 | .6612447 | .7430711 |
|             | _cons         | 4.043687 | .098905  | 40.88 | 0.000 | 3.849837 | 4.237537 |
| ky27PHY5 <- | PHYSICAL      | .6998409 | .0208952 | 33.49 | 0.000 | .658887  | .7407948 |
|             | _cons         | 4.289075 | .1042696 | 41.13 | 0.000 | 4.08471  | 4.49344  |
| ky27PWB1 <- | PSYCHOLOGICAL | .7370935 | .017624  | 41.82 | 0.000 | .702551  | .7716359 |
|             | _cons         | 4.76785  | .1148198 | 41.52 | 0.000 | 4.542807 | 4.992892 |
| ky27PWB2 <- | PSYCHOLOGICAL | .7039837 | .0191043 | 36.85 | 0.000 | .66654   | .7414275 |
|             | _cons         | 5.061932 | .1213445 | 41.72 | 0.000 | 4.824101 | 5.299763 |
| ky27PWB3 <- | PSYCHOLOGICAL | .7211025 | .0183502 | 39.30 | 0.000 | .6851368 | .7570683 |
|             | _cons         | 5.538671 | .1319787 | 41.97 | 0.000 | 5.279998 | 5.797345 |
| ky27PWB4 <- | PSYCHOLOGICAL | .5156469 | .0264094 | 19.53 | 0.000 | .4638853 | .5674084 |
|             | _cons         | 6.218415 | .1472359 | 42.23 | 0.000 | 5.929838 | 6.506992 |
| ky27PWB5 <- | PSYCHOLOGICAL | .5227136 | .0261519 | 19.99 | 0.000 | .4714569 | .5739703 |
|             | _cons         | 6.577886 | .1553396 | 42.35 | 0.000 | 6.273426 | 6.882346 |
| ky27PWB6 <- | PSYCHOLOGICAL | .5667765 | .0246409 | 23.00 | 0.000 | .5184813 | .6150717 |
|             | _cons         | 6.301413 | .149105  | 42.26 | 0.000 | 6.009172 | 6.593653 |
| ky27PWB7 <- | PSYCHOLOGICAL | .6161194 | .0226628 | 27.19 | 0.000 | .5717012 | .6605376 |
|             | _cons         | 5.059046 | .1212804 | 41.71 | 0.000 | 4.821341 | 5.296752 |
| ky27PAR1 <- | AUTONOMY      | .4752028 | .0284256 | 16.72 | 0.000 | .4194896 | .530916  |
|             | _cons         | 3.363108 | .0842326 | 39.93 | 0.000 | 3.198015 | 3.528201 |
| ky27PAR2 <- | AUTONOMY      | .6652736 | .0220218 | 30.21 | 0.000 | .6221116 | .7084356 |
|             | _cons         | 4.109522 | .100341  | 40.96 | 0.000 | 3.912858 | 4.306187 |
| ky27PAR3 <- | AUTONOMY      | .7070188 | .0202229 | 34.96 | 0.000 | .6673827 | .7466549 |
|             | _cons         | 4.065185 | .0993736 | 40.91 | 0.000 | 3.870416 | 4.259953 |
| ky27PAR4 <- | AUTONOMY      | .6070469 | .0240225 | 25.27 | 0.000 | .5599637 | .6541301 |
|             | _cons         | 4.648444 | .1121795 | 41.44 | 0.000 | 4.428576 | 4.868311 |
| ky27PAR5 <- | AUTONOMY      | .6441093 | .0227089 | 28.36 | 0.000 | .5996007 | .6886178 |
|             | _cons         | 4.76785  | .1148198 | 41.52 | 0.000 | 4.542808 | 4.992893 |
| ky27PAR6 <- | AUTONOMY      | .6205332 | .0238701 | 26.00 | 0.000 | .5737486 | .6673177 |
|             | _cons         | 3.527677 | .0877475 | 40.20 | 0.000 | 3.355695 | 3.699659 |
| ky27PAR7 <- | AUTONOMY      | .5684733 | .0258113 | 22.02 | 0.000 | .517884  | .6190625 |
|             | _cons         | 4.036609 | .0987508 | 40.88 | 0.000 | 3.843061 | 4.230157 |
| ky27SOC1 <- | SOCIAL        | .6242649 | .0239466 | 26.07 | 0.000 | .5773305 | .6711994 |
|             | _cons         | 4.515678 | .1092506 | 41.33 | 0.000 | 4.301551 | 4.729805 |
| ky27SOC2 <- | SOCIAL        | .7631622 | .0190438 | 40.07 | 0.000 | .7258371 | .8004874 |

|                              |                    |          |          |       |       |          |          |
|------------------------------|--------------------|----------|----------|-------|-------|----------|----------|
|                              | _cons              | 5.567785 | .1326301 | 41.98 | 0.000 | 5.307835 | 5.827735 |
| kY27SOC3 <-                  |                    |          |          |       |       |          |          |
|                              | SOCIAL             | .7286866 | .020213  | 36.05 | 0.000 | .6890699 | .7683033 |
|                              | _cons              | 4.421022 | .107167  | 41.25 | 0.000 | 4.210979 | 4.631066 |
| kY27SOC4 <-                  |                    |          |          |       |       |          |          |
|                              | SOCIAL             | .6354352 | .0233856 | 27.17 | 0.000 | .5896003 | .6812701 |
|                              | _cons              | 4.393691 | .1065662 | 41.23 | 0.000 | 4.184825 | 4.602557 |
| kY27SCH1 <-                  |                    |          |          |       |       |          |          |
|                              | SCHOOL             | .7796608 | .017593  | 44.32 | 0.000 | .7451791 | .8141424 |
|                              | _cons              | 3.811582 | .0938633 | 40.61 | 0.000 | 3.627613 | 3.995551 |
| kY27SCH2 <-                  |                    |          |          |       |       |          |          |
|                              | SCHOOL             | .7488888 | .0189001 | 39.62 | 0.000 | .7118453 | .7859324 |
|                              | _cons              | 4.5688   | .1104216 | 41.38 | 0.000 | 4.352377 | 4.785222 |
| kY27SCH3 <-                  |                    |          |          |       |       |          |          |
|                              | SCHOOL             | .6178492 | .0240589 | 25.68 | 0.000 | .5706945 | .6650038 |
|                              | _cons              | 5.21387  | .1247267 | 41.80 | 0.000 | 4.96941  | 5.45833  |
| kY27SCH4 <-                  |                    |          |          |       |       |          |          |
|                              | SCHOOL             | .5638017 | .025668  | 21.97 | 0.000 | .5134933 | .6141102 |
|                              | _cons              | 4.582689 | .110728  | 41.39 | 0.000 | 4.365667 | 4.799712 |
|                              | var(e.kY27PHY1)    | .7007303 | .0289909 |       |       | .6461518 | .7599188 |
|                              | var(e.kY27PHY2)    | .4437243 | .0287005 |       |       | .390892  | .5036973 |
|                              | var(e.kY27PHY3)    | .5913369 | .0297782 |       |       | .5357605 | .6526785 |
|                              | var(e.kY27PHY4)    | .5069743 | .0293144 |       |       | .4526553 | .5678116 |
|                              | var(e.kY27PHY5)    | .5102227 | .0292467 |       |       | .456003  | .5708892 |
|                              | var(e.kY27PWB1)    | .4566932 | .0259811 |       |       | .4085075 | .5105627 |
|                              | var(e.kY27PWB2)    | .5044069 | .0268982 |       |       | .4543489 | .5599801 |
|                              | var(e.kY27PWB3)    | .4800112 | .0264648 |       |       | .4308454 | .5347874 |
|                              | var(e.kY27PWB4)    | .7341083 | .0272359 |       |       | .6826216 | .7894784 |
|                              | var(e.kY27PWB5)    | .7267705 | .0273399 |       |       | .6751131 | .7823805 |
|                              | var(e.kY27PWB6)    | .6787644 | .0279317 |       |       | .6261688 | .7357779 |
|                              | var(e.kY27PWB7)    | .6203969 | .0279259 |       |       | .568008  | .6776177 |
|                              | var(e.kY27PAR1)    | .7741823 | .0270159 |       |       | .7230024 | .8289852 |
|                              | var(e.kY27PAR2)    | .557411  | .0293011 |       |       | .5028413 | .6179028 |
|                              | var(e.kY27PAR3)    | .5001244 | .0285959 |       |       | .4471038 | .5594326 |
|                              | var(e.kY27PAR4)    | .6314941 | .0291655 |       |       | .5768416 | .6913246 |
|                              | var(e.kY27PAR5)    | .5851232 | .029254  |       |       | .5305062 | .6453633 |
|                              | var(e.kY27PAR6)    | .6149386 | .0296244 |       |       | .5595328 | .6758308 |
|                              | var(e.kY27PAR7)    | .6768382 | .0293461 |       |       | .621697  | .73687   |
|                              | var(e.kY27SOC1)    | .6102933 | .029898  |       |       | .5544196 | .6717978 |
|                              | var(e.kY27SOC2)    | .4175834 | .029067  |       |       | .3643285 | .4786228 |
|                              | var(e.kY27SOC3)    | .4690158 | .0294578 |       |       | .4146917 | .5304563 |
|                              | var(e.kY27SOC4)    | .5962221 | .0297201 |       |       | .5407269 | .6574128 |
|                              | var(e.kY27SCH1)    | .3921291 | .0274331 |       |       | .3418846 | .4497577 |
|                              | var(e.kY27SCH2)    | .4391655 | .0283082 |       |       | .3870443 | .4983057 |
|                              | var(e.kY27SCH3)    | .6182624 | .0297296 |       |       | .562655  | .6793655 |
|                              | var(e.kY27SCH4)    | .6821276 | .0289434 |       |       | .6276944 | .7412811 |
|                              | var(PHYSICAL)      | 1        | .        |       |       | .        | .        |
|                              | var(PSYCHOLOGICAL) | 1        | .        |       |       | .        | .        |
|                              | var(AUTONOMY)      | 1        | .        |       |       | .        | .        |
|                              | var(SOCIAL)        | 1        | .        |       |       | .        | .        |
|                              | var(SCHOOL)        | 1        | .        |       |       | .        | .        |
| cov(PHYSICAL, PSYCHOLOGICAL) |                    |          |          |       |       |          |          |
|                              |                    | .6541078 | .026233  | 24.93 | 0.000 | .6026922 | .7055235 |
| cov(PHYSICAL, AUTONOMY)      |                    |          |          |       |       |          |          |
|                              |                    | .4849063 | .0328322 | 14.77 | 0.000 | .4205563 | .5492563 |
| cov(PHYSICAL, SOCIAL)        |                    |          |          |       |       |          |          |
|                              |                    | .5066011 | .0327333 | 15.48 | 0.000 | .442445  | .5707572 |
| cov(PHYSICAL, SCHOOL)        |                    |          |          |       |       |          |          |
|                              |                    | .5596716 | .0308457 | 18.14 | 0.000 | .4992152 | .6201281 |
| cov(PSYCHOLOGICAL, AUTONOMY) |                    |          |          |       |       |          |          |
|                              |                    | .7031186 | .0242277 | 29.02 | 0.000 | .6556331 | .7506041 |
| cov(PSYCHOLOGICAL, SOCIAL)   |                    |          |          |       |       |          |          |
|                              |                    | .7377955 | .0232452 | 31.74 | 0.000 | .6922357 | .7833553 |
| cov(PSYCHOLOGICAL, SCHOOL)   |                    |          |          |       |       |          |          |
|                              |                    | .7935976 | .0207849 | 38.18 | 0.000 | .75286   | .8343352 |
| cov(AUTONOMY, SOCIAL)        |                    |          |          |       |       |          |          |
|                              |                    | .6208162 | .0287906 | 21.56 | 0.000 | .5643875 | .6772448 |
| cov(AUTONOMY, SCHOOL)        |                    |          |          |       |       |          |          |
|                              |                    | .6378435 | .0278992 | 22.86 | 0.000 | .5831621 | .6925249 |
| cov(SOCIAL, SCHOOL)          |                    |          |          |       |       |          |          |
|                              |                    | .6618825 | .0278245 | 23.79 | 0.000 | .6073476 | .7164175 |

LR test of model vs. saturated: chi2(314) = 974.95, Prob > chi2 = 0.0000

3 . estat gof, stats(all)

| Fit statistic        | Value            | Description                              |
|----------------------|------------------|------------------------------------------|
| Likelihood ratio     |                  |                                          |
| chi2_ms(314)         | <b>974.948</b>   | model vs. saturated                      |
| p > chi2             | <b>0.000</b>     |                                          |
| chi2_bs(351)         | <b>9408.677</b>  | baseline vs. saturated                   |
| p > chi2             | <b>0.000</b>     |                                          |
| Population error     |                  |                                          |
| RMSEA                | <b>0.047</b>     | Root mean squared error of approximation |
| 90% CI, lower bound  | <b>0.044</b>     |                                          |
| upper bound          | <b>0.051</b>     |                                          |
| pclose               | <b>0.898</b>     | Probability RMSEA <= 0.05                |
| Information criteria |                  |                                          |
| AIC                  | <b>58216.448</b> | Akaike's information criterion           |
| BIC                  | <b>58657.230</b> | Bayesian information criterion           |
| Baseline comparison  |                  |                                          |
| CFI                  | <b>0.927</b>     | Comparative fit index                    |
| TLI                  | <b>0.918</b>     | Tucker-Lewis index                       |
| Size of residuals    |                  |                                          |
| SRMR                 | <b>0.038</b>     | Standardized root mean squared residual  |
| CD                   | <b>0.998</b>     | Coefficient of determination             |

4 . estat mindices

Modification indices

|                    | MI            | df       | P>MI        | EPC              | Standard EPC     |
|--------------------|---------------|----------|-------------|------------------|------------------|
| <b>Measurement</b> |               |          |             |                  |                  |
| ky27PWB4 <-        |               |          |             |                  |                  |
| PHYSICAL           | <b>6.389</b>  | <b>1</b> | <b>0.01</b> | <b>-.1547022</b> | <b>-.1204166</b> |
| SOCIAL             | <b>3.934</b>  | <b>1</b> | <b>0.05</b> | <b>-.1387123</b> | <b>-.1150568</b> |
| ky27PWB6 <-        |               |          |             |                  |                  |
| PHYSICAL           | <b>13.603</b> | <b>1</b> | <b>0.00</b> | <b>-.2308383</b> | <b>-.1712669</b> |
| AUTONOMY           | <b>5.845</b>  | <b>1</b> | <b>0.02</b> | <b>.1697317</b>  | <b>.123267</b>   |
| ky27PAR2 <-        |               |          |             |                  |                  |
| PHYSICAL           | <b>27.785</b> | <b>1</b> | <b>0.00</b> | <b>.3491571</b>  | <b>.1921771</b>  |
| PSYCHOLOGICAL      | <b>53.255</b> | <b>1</b> | <b>0.00</b> | <b>.5115018</b>  | <b>.3568259</b>  |
| SOCIAL             | <b>16.224</b> | <b>1</b> | <b>0.00</b> | <b>.3008454</b>  | <b>.1764541</b>  |
| SCHOOL             | <b>7.355</b>  | <b>1</b> | <b>0.01</b> | <b>.145124</b>   | <b>.1214936</b>  |
| ky27PAR5 <-        |               |          |             |                  |                  |
| PHYSICAL           | <b>12.868</b> | <b>1</b> | <b>0.00</b> | <b>-.2274182</b> | <b>-.1322572</b> |
| PSYCHOLOGICAL      | <b>5.349</b>  | <b>1</b> | <b>0.02</b> | <b>-.1546519</b> | <b>-.1139929</b> |
| SCHOOL             | <b>4.090</b>  | <b>1</b> | <b>0.04</b> | <b>-.1033705</b> | <b>-.0914374</b> |
| ky27PAR6 <-        |               |          |             |                  |                  |
| SOCIAL             | <b>8.148</b>  | <b>1</b> | <b>0.00</b> | <b>-.2515958</b> | <b>-.1276479</b> |
| ky27PAR7 <-        |               |          |             |                  |                  |
| PSYCHOLOGICAL      | <b>11.567</b> | <b>1</b> | <b>0.00</b> | <b>-.2680458</b> | <b>-.1728016</b> |
| SOCIAL             | <b>7.204</b>  | <b>1</b> | <b>0.01</b> | <b>-.2267539</b> | <b>-.1229059</b> |
| ky27SOC1 <-        |               |          |             |                  |                  |
| SCHOOL             | <b>13.225</b> | <b>1</b> | <b>0.00</b> | <b>-.2030899</b> | <b>-.1809601</b> |
| ky27SOC2 <-        |               |          |             |                  |                  |
| AUTONOMY           | <b>9.374</b>  | <b>1</b> | <b>0.00</b> | <b>-.2135341</b> | <b>-.137716</b>  |
| ky27SOC3 <-        |               |          |             |                  |                  |

|                            |        |   |      |           |           |
|----------------------------|--------|---|------|-----------|-----------|
| AUTONOMY                   | 8.641  | 1 | 0.00 | .2397283  | .1314307  |
| SCHOOL                     | 12.057 | 1 | 0.00 | .2018487  | .1719565  |
| <hr/>                      |        |   |      |           |           |
| ky27SCH1 <-                |        |   |      |           |           |
| PSYCHOLOGICAL              | 31.539 | 1 | 0.00 | .6430974  | .4178088  |
| SOCIAL                     | 5.306  | 1 | 0.02 | .2101002  | .1147642  |
| <hr/>                      |        |   |      |           |           |
| ky27SCH2 <-                |        |   |      |           |           |
| PSYCHOLOGICAL              | 8.565  | 1 | 0.00 | -.2829343 | -.2113758 |
| AUTONOMY                   | 6.475  | 1 | 0.01 | -.2017918 | -.1164295 |
| SOCIAL                     | 9.943  | 1 | 0.00 | -.247427  | -.1554161 |
| <hr/>                      |        |   |      |           |           |
| cov(e.kY27PHY1,e.kY27PHY2) | 5.407  | 1 | 0.02 | .0528619  | .097559   |
| cov(e.kY27PHY1,e.kY27PHY3) | 4.117  | 1 | 0.04 | .0501008  | .0769019  |
| cov(e.kY27PHY1,e.kY27PHY5) | 3.943  | 1 | 0.05 | -.041052  | -.0788713 |
| cov(e.kY27PHY1,e.kY27PWB3) | 3.972  | 1 | 0.05 | -.0310219 | -.0725229 |
| cov(e.kY27PHY1,e.kY27PWB5) | 4.092  | 1 | 0.04 | -.032899  | -.0701947 |
| cov(e.kY27PHY1,e.kY27PAR7) | 4.776  | 1 | 0.03 | .0524035  | .0770203  |
| cov(e.kY27PHY1,e.kY27SOC2) | 5.895  | 1 | 0.02 | -.0388898 | -.0942629 |
| cov(e.kY27PHY1,e.kY27SCH1) | 5.520  | 1 | 0.02 | -.047188  | -.0918263 |
| cov(e.kY27PHY1,e.kY27SCH4) | 8.508  | 1 | 0.00 | .0629826  | .1027617  |
| cov(e.kY27PHY2,e.kY27PHY3) | 7.539  | 1 | 0.01 | -.0680541 | -.1240904 |
| cov(e.kY27PHY2,e.kY27PWB1) | 4.137  | 1 | 0.04 | .033478   | .08136    |
| cov(e.kY27PHY2,e.kY27PWB5) | 8.859  | 1 | 0.00 | .0442771  | .1122258  |
| cov(e.kY27PHY2,e.kY27SCH4) | 5.908  | 1 | 0.02 | -.0480163 | -.0930659 |
| cov(e.kY27PHY3,e.kY27PHY4) | 7.506  | 1 | 0.01 | .0662914  | .116154   |
| cov(e.kY27PHY3,e.kY27PWB4) | 4.924  | 1 | 0.03 | -.036972  | -.0788895 |
| cov(e.kY27PHY3,e.kY27PWB6) | 7.825  | 1 | 0.01 | -.0473591 | -.100172  |
| cov(e.kY27PHY3,e.kY27PAR2) | 7.277  | 1 | 0.01 | .057892   | .1002417  |
| cov(e.kY27PHY3,e.kY27PAR5) | 8.804  | 1 | 0.00 | -.0612724 | -.1094138 |
| cov(e.kY27PHY3,e.kY27SOC1) | 4.013  | 1 | 0.05 | .041882   | .073766   |
| cov(e.kY27PHY3,e.kY27SCH1) | 6.087  | 1 | 0.01 | -.0515201 | -.0990538 |
| cov(e.kY27PHY4,e.kY27PAR6) | 7.299  | 1 | 0.01 | .0617346  | .1017133  |
| cov(e.kY27PHY5,e.kY27PAR4) | 9.524  | 1 | 0.00 | -.0549043 | -.1155974 |
| cov(e.kY27PHY5,e.kY27SCH3) | 5.997  | 1 | 0.01 | -.0372399 | -.0921365 |
| cov(e.kY27PWB1,e.kY27PWB2) | 9.350  | 1 | 0.00 | .042234   | .1238124  |
| cov(e.kY27PWB1,e.kY27PWB6) | 7.962  | 1 | 0.00 | -.0377655 | -.1064644 |
| cov(e.kY27PWB1,e.kY27PAR4) | 4.145  | 1 | 0.04 | .0336698  | .0754844  |
| cov(e.kY27PWB1,e.kY27SOC1) | 9.559  | 1 | 0.00 | -.0494056 | -.1159768 |
| cov(e.kY27PWB1,e.kY27SCH1) | 10.034 | 1 | 0.00 | .0510981  | .1309381  |
| cov(e.kY27PWB1,e.kY27SCH3) | 7.440  | 1 | 0.01 | -.0386768 | -.1018938 |
| cov(e.kY27PWB2,e.kY27PWB3) | 14.504 | 1 | 0.00 | .0453574  | .1519485  |
| cov(e.kY27PWB2,e.kY27PWB5) | 17.893 | 1 | 0.00 | -.0505189 | -.1544607 |
| cov(e.kY27PWB2,e.kY27PWB6) | 11.109 | 1 | 0.00 | -.0401222 | -.1230863 |
| cov(e.kY27PWB2,e.kY27PAR2) | 5.548  | 1 | 0.02 | .03494    | .0877475  |
| cov(e.kY27PWB2,e.kY27SOC2) | 8.386  | 1 | 0.00 | -.0334859 | -.1163078 |
| cov(e.kY27PWB2,e.kY27SOC4) | 6.482  | 1 | 0.01 | .0389707  | .0944366  |
| cov(e.kY27PWB3,e.kY27PWB4) | 4.242  | 1 | 0.04 | -.0233292 | -.0758157 |
| cov(e.kY27PWB3,e.kY27PWB5) | 7.595  | 1 | 0.01 | -.0316496 | -.1016164 |
| cov(e.kY27PWB3,e.kY27PAR2) | 10.769 | 1 | 0.00 | .0466942  | .1231421  |
| cov(e.kY27PWB3,e.kY27PAR6) | 13.380 | 1 | 0.00 | -.062214  | -.1351219 |
| cov(e.kY27PWB3,e.kY27PAR7) | 7.569  | 1 | 0.01 | -.0453355 | -.1002667 |
| cov(e.kY27PWB3,e.kY27SOC1) | 6.955  | 1 | 0.01 | .0365896  | .0981522  |
| cov(e.kY27PWB3,e.kY27SOC2) | 5.726  | 1 | 0.02 | .0265641  | .0968886  |
| cov(e.kY27PWB3,e.kY27SOC4) | 5.807  | 1 | 0.02 | -.0353859 | -.0900459 |
| cov(e.kY27PWB4,e.kY27PWB5) | 55.085 | 1 | 0.00 | .0863886  | .2562314  |
| cov(e.kY27PWB4,e.kY27PWB6) | 37.756 | 1 | 0.00 | .071877   | .2139081  |
| cov(e.kY27PWB4,e.kY27PAR4) | 6.175  | 1 | 0.01 | -.0367906 | -.0870725 |
| cov(e.kY27PWB4,e.kY27SOC3) | 4.288  | 1 | 0.04 | -.0285137 | -.0770638 |
| cov(e.kY27PWB5,e.kY27PWB6) | 41.365 | 1 | 0.00 | .0762452  | .2241737  |
| cov(e.kY27PWB5,e.kY27PAR6) | 4.313  | 1 | 0.04 | .0368825  | .0731095  |
| cov(e.kY27PWB6,e.kY27PAR5) | 4.342  | 1 | 0.04 | .0298623  | .074374   |
| cov(e.kY27PWB7,e.kY27SOC2) | 4.274  | 1 | 0.04 | .0278677  | .0806758  |
| cov(e.kY27PWB7,e.kY27SCH3) | 4.359  | 1 | 0.04 | -.0312937 | -.0747766 |
| cov(e.kY27PAR1,e.kY27PAR2) | 14.849 | 1 | 0.00 | .0962157  | .1423638  |
| cov(e.kY27PAR1,e.kY27SOC4) | 5.372  | 1 | 0.02 | -.0576826 | -.0823547 |
| cov(e.kY27PAR1,e.kY27SCH1) | 5.397  | 1 | 0.02 | -.0544573 | -.0894695 |
| cov(e.kY27PAR2,e.kY27PAR4) | 4.942  | 1 | 0.03 | -.0448884 | -.0862109 |
| cov(e.kY27PAR2,e.kY27PAR6) | 4.798  | 1 | 0.03 | -.0525596 | -.0855763 |
| cov(e.kY27PAR2,e.kY27PAR7) | 5.595  | 1 | 0.02 | -.0543315 | -.0900812 |
| cov(e.kY27PAR2,e.kY27SOC1) | 5.578  | 1 | 0.02 | .0434687  | .0874144  |
| cov(e.kY27PAR2,e.kY27SOC3) | 5.027  | 1 | 0.02 | -.0398217 | -.0873374 |

|                            |         |   |      |           |           |
|----------------------------|---------|---|------|-----------|-----------|
| cov(e.kY27PAR2,e.kY27SCH1) | 7.471   | 1 | 0.01 | -.0502949 | -.110407  |
| cov(e.kY27PAR3,e.kY27PAR4) | 3.915   | 1 | 0.05 | .0400188  | .0793793  |
| cov(e.kY27PAR3,e.kY27PAR5) | 20.784  | 1 | 0.00 | .0890434  | .1875004  |
| cov(e.kY27PAR3,e.kY27PAR7) | 5.593   | 1 | 0.02 | -.054287  | -.0929594 |
| cov(e.kY27PAR4,e.kY27PAR5) | 7.142   | 1 | 0.01 | .0516204  | .1022414  |
| cov(e.kY27PAR5,e.kY27PAR7) | 4.575   | 1 | 0.03 | -.0470401 | -.0804318 |
| cov(e.kY27PAR6,e.kY27PAR7) | 134.704 | 1 | 0.00 | .3158119  | .4312256  |
| cov(e.kY27PAR6,e.kY27SOC2) | 7.812   | 1 | 0.01 | -.0489904 | -.1103179 |
| cov(e.kY27PAR7,e.kY27SOC2) | 6.783   | 1 | 0.01 | -.0442118 | -.1013805 |
| cov(e.kY27PAR7,e.kY27SCH4) | 8.412   | 1 | 0.00 | .0663091  | .1023519  |
| cov(e.kY27SOC1,e.kY27SOC2) | 29.240  | 1 | 0.00 | .0901639  | .250769   |
| cov(e.kY27SOC1,e.kY27SOC4) | 22.129  | 1 | 0.00 | -.0956369 | -.1855762 |
| cov(e.kY27SOC2,e.kY27SOC3) | 21.518  | 1 | 0.00 | -.0848208 | -.2572863 |
| cov(e.kY27SOC3,e.kY27SOC4) | 6.192   | 1 | 0.01 | .0518344  | .1096955  |
| cov(e.kY27SOC3,e.kY27SCH4) | 5.092   | 1 | 0.02 | .0418202  | .0853898  |
| cov(e.kY27SCH1,e.kY27SCH3) | 34.236  | 1 | 0.00 | -.1074412 | -.2692431 |
| cov(e.kY27SCH2,e.kY27SCH3) | 22.578  | 1 | 0.00 | .0756603  | .2060208  |
| cov(e.kY27SCH3,e.kY27SCH4) | 11.390  | 1 | 0.00 | .0597746  | .125593   |

EPC = expected parameter change

5 . sem (PHYSICAL -> KY27PHY1 KY27PHY2 KY27PHY3 KY27PHY4 KY27PHY5) (PSYCHOLOGICAL -> KY27PWB1 KY27PWB2 KY27PWB3 KY27PWB4 KY27PWB5) (AUTONOMY -> KY27PAR1 KY27PAR2 KY27PAR3 KY27PAR4 KY27PAR5 KY27PAR6 KY27PAR7) (SOCIAL -> KY27SOC1 KY27SOC2 KY27SOC3 KY27SOC4) (SCHOOL -> KY27SCH1 KY27SCH2 KY27SCH3 KY27SCH4), cov(e.kY27PWB4\*e.kY27PWB5) cov(e.kY27PWB4\*e.kY27PAR6\*e.kY27PAR7) stand

note: The following observed variable names will be treated as latent variables: KY27PHYc, KC27pwmiss, KC27pw\_T, KC27pa\_R, PARmiss, KC27pa\_T, KC27pe\_R, PERmiss, KC27pe\_T, KC27sc\_R, S intention use the nocapslatent option, or identify the latent variable names in the latent (306 observations with missing values excluded)

Endogenous variables

Measurement: KY27PHY1 KY27PHY2 KY27PHY3 KY27PHY4 KY27PHY5 KY27PWB1 KY27PWB2 KY27PWB3 KY27PWB4 KY27PAR1 KY27PAR2 KY27PAR3 KY27PAR4 KY27PAR5 KY27PAR6 KY27PAR7 KY27SOC1 KY27SOC2 KY27SOC3 KY27SCH1 KY27SCH2 KY27SCH3 KY27SCH4

Exogenous variables

Latent: PHYSICAL PSYCHOLOGICAL AUTONOMY SOCIAL SCHOOL

Fitting target model: *(Modified)*

Iteration 0: log likelihood = -29053.578  
 Iteration 1: log likelihood = -28958.94  
 Iteration 2: log likelihood = -28892.299  
 Iteration 3: log likelihood = -28883.749  
 Iteration 4: log likelihood = -28883.691  
 Iteration 5: log likelihood = -28883.691

Structural equation model Number of obs = 938  
 Estimation method = ml  
 Log likelihood = -28883.691

- ( 1) [KY27PHY1]PHYSICAL = 1
- ( 2) [KY27PWB1]PSYCHOLOGICAL = 1
- ( 3) [KY27PAR1]AUTONOMY = 1
- ( 4) [KY27SOC1]SOCIAL = 1
- ( 5) [KY27SCH1]SCHOOL = 1

| Standardized               | Coef.    | Std. Err. | z        | P> z  | [95% Conf. Interval] |          |          |
|----------------------------|----------|-----------|----------|-------|----------------------|----------|----------|
| Measurement<br>KY27PHY1 <- | PHYSICAL | .546518   | .0265073 | 20.62 | 0.000                | .4945647 | .5984713 |
|                            | _cons    | 4.094539  | .100014  | 40.94 | 0.000                | 3.898516 | 4.290563 |
| KY27PHY2 <-                | PHYSICAL | .7449378  | .0192559 | 38.69 | 0.000                | .707197  | .7826786 |
|                            | _cons    | 3.8748    | .0952331 | 40.69 | 0.000                | 3.688147 | 4.061453 |
| KY27PHY3 <-                |          |           |          |       |                      |          |          |

|             |                        |                      |                      |                |                |                      |                      |
|-------------|------------------------|----------------------|----------------------|----------------|----------------|----------------------|----------------------|
|             | PHYSICAL<br>_cons      | .6404359<br>3.639534 | .023237<br>.0901497  | 27.56<br>40.37 | 0.000<br>0.000 | .5948923<br>3.462844 | .6859795<br>3.816224 |
| KY27PHY4 <- | PHYSICAL<br>_cons      | .7018307<br>4.043687 | .0208688<br>.098905  | 33.63<br>40.88 | 0.000<br>0.000 | .6609287<br>3.849837 | .7427328<br>4.237537 |
| KY27PHY5 <- | PHYSICAL<br>_cons      | .7005367<br>4.289075 | .020857<br>.1042696  | 33.59<br>41.13 | 0.000<br>0.000 | .6596576<br>4.08471  | .7414157<br>4.49344  |
| KY27PWB1 <- | PSYCHOLOGICAL<br>_cons | .7425038<br>4.76785  | .017547<br>.1148198  | 42.32<br>41.52 | 0.000<br>0.000 | .7081124<br>4.542807 | .7768952<br>4.992892 |
| KY27PWB2 <- | PSYCHOLOGICAL<br>_cons | .7143063<br>5.061932 | .0188139<br>.1213445 | 37.97<br>41.72 | 0.000<br>0.000 | .6774317<br>4.824101 | .7511808<br>5.299763 |
| KY27PWB3 <- | PSYCHOLOGICAL<br>_cons | .7291324<br>5.538671 | .0181594<br>.1319787 | 40.15<br>41.97 | 0.000<br>0.000 | .6935407<br>5.279998 | .7647241<br>5.797345 |
| KY27PWB4 <- | PSYCHOLOGICAL<br>_cons | .4735832<br>6.218415 | .0277934<br>.1472359 | 17.04<br>42.23 | 0.000<br>0.000 | .4191092<br>5.929838 | .5280572<br>6.506992 |
| KY27PWB5 <- | PSYCHOLOGICAL<br>_cons | .4807617<br>6.577887 | .0275735<br>.1553395 | 17.44<br>42.35 | 0.000<br>0.000 | .4267187<br>6.273427 | .5348047<br>6.882346 |
| KY27PWB6 <- | PSYCHOLOGICAL<br>_cons | .5312969<br>6.301413 | .0259534<br>.149105  | 20.47<br>42.26 | 0.000<br>0.000 | .4804292<br>6.009172 | .5821647<br>6.593653 |
| KY27PWB7 <- | PSYCHOLOGICAL<br>_cons | .6173795<br>5.059046 | .0227211<br>.1212804 | 27.17<br>41.71 | 0.000<br>0.000 | .5728469<br>4.821341 | .6619121<br>5.296752 |
| KY27PAR1 <- | AUTONOMY<br>_cons      | .4807451<br>3.363107 | .0284588<br>.0842327 | 16.89<br>39.93 | 0.000<br>0.000 | .4249669<br>3.198014 | .5365233<br>3.5282   |
| KY27PAR2 <- | AUTONOMY<br>_cons      | .6750835<br>4.109522 | .0219798<br>.100341  | 30.71<br>40.96 | 0.000<br>0.000 | .632004<br>3.912857  | .718163<br>4.306187  |
| KY27PAR3 <- | AUTONOMY<br>_cons      | .7169163<br>4.065184 | .0201718<br>.0993736 | 35.54<br>40.91 | 0.000<br>0.000 | .6773802<br>3.870415 | .7564523<br>4.259953 |
| KY27PAR4 <- | AUTONOMY<br>_cons      | .6107<br>4.648443    | .0241453<br>.1121795 | 25.29<br>41.44 | 0.000<br>0.000 | .5633761<br>4.428575 | .6580238<br>4.868311 |
| KY27PAR5 <- | AUTONOMY<br>_cons      | .651469<br>4.76785   | .0227181<br>.1148198 | 28.68<br>41.52 | 0.000<br>0.000 | .6069424<br>4.542807 | .6959956<br>4.992892 |
| KY27PAR6 <- | AUTONOMY<br>_cons      | .5695153<br>3.527677 | .0256722<br>.0877475 | 22.18<br>40.20 | 0.000<br>0.000 | .5191988<br>3.355695 | .6198319<br>3.699659 |
| KY27PAR7 <- | AUTONOMY<br>_cons      | .5104045<br>4.036609 | .0277494<br>.0987508 | 18.39<br>40.88 | 0.000<br>0.000 | .4560167<br>3.843061 | .5647923<br>4.230157 |
| KY27SOC1 <- | SOCIAL<br>_cons        | .6243019<br>4.515678 | .0239402<br>.1092506 | 26.08<br>41.33 | 0.000<br>0.000 | .57738<br>4.301551   | .6712238<br>4.729805 |
| KY27SOC2 <- |                        |                      |                      |                |                |                      |                      |

|             |                               |          |          |       |       |          |          |
|-------------|-------------------------------|----------|----------|-------|-------|----------|----------|
|             | SOCIAL                        | .7629376 | .0190351 | 40.08 | 0.000 | .7256295 | .8002458 |
|             | _cons                         | 5.567785 | .1326301 | 41.98 | 0.000 | 5.307835 | 5.827735 |
| <hr/>       |                               |          |          |       |       |          |          |
| ky27SOC3 <- | SOCIAL                        | .7291783 | .0201766 | 36.14 | 0.000 | .6896329 | .7687236 |
|             | _cons                         | 4.421022 | .107167  | 41.25 | 0.000 | 4.210979 | 4.631066 |
| <hr/>       |                               |          |          |       |       |          |          |
| ky27SOC4 <- | SOCIAL                        | .6350459 | .0233929 | 27.15 | 0.000 | .5891966 | .6808952 |
|             | _cons                         | 4.393691 | .1065662 | 41.23 | 0.000 | 4.184825 | 4.602557 |
| <hr/>       |                               |          |          |       |       |          |          |
| ky27SCH1 <- | SCHOOL                        | .7789386 | .0176625 | 44.10 | 0.000 | .7443207 | .8135565 |
|             | _cons                         | 3.811582 | .0938633 | 40.61 | 0.000 | 3.627613 | 3.995551 |
| <hr/>       |                               |          |          |       |       |          |          |
| ky27SCH2 <- | SCHOOL                        | .7503243 | .0188672 | 39.77 | 0.000 | .7133453 | .7873033 |
|             | _cons                         | 4.5688   | .1104216 | 41.38 | 0.000 | 4.352377 | 4.785222 |
| <hr/>       |                               |          |          |       |       |          |          |
| ky27SCH3 <- | SCHOOL                        | .6181606 | .0240719 | 25.68 | 0.000 | .5709805 | .6653406 |
|             | _cons                         | 5.21387  | .1247267 | 41.80 | 0.000 | 4.96941  | 5.45833  |
| <hr/>       |                               |          |          |       |       |          |          |
| ky27SCH4 <- | SCHOOL                        | .562715  | .0257234 | 21.88 | 0.000 | .5122981 | .6131319 |
|             | _cons                         | 4.582689 | .110728  | 41.39 | 0.000 | 4.365667 | 4.799712 |
| <hr/>       |                               |          |          |       |       |          |          |
|             | var (e.kY27PHY1)              | .701318  | .0289734 |       |       | .6467694 | .7604673 |
|             | var (e.kY27PHY2)              | .4450675 | .0286888 |       |       | .3922455 | .5050031 |
|             | var (e.kY27PHY3)              | .5898419 | .0297636 |       |       | .5342983 | .6511596 |
|             | var (e.kY27PHY4)              | .5074336 | .0292927 |       |       | .4531498 | .5682202 |
|             | var (e.kY27PHY5)              | .5092484 | .0292222 |       |       | .4550772 | .5698679 |
|             | var (e.kY27PWB1)              | .4486881 | .0260574 |       |       | .400416  | .5027796 |
|             | var (e.kY27PWB2)              | .4897666 | .0268778 |       |       | .4398213 | .5453835 |
|             | var (e.kY27PWB3)              | .4683659 | .0264812 |       |       | .4192362 | .523253  |
|             | var (e.kY27PWB4)              | .7757189 | .0263249 |       |       | .7258015 | .8290695 |
|             | var (e.kY27PWB5)              | .7688682 | .0265125 |       |       | .7186217 | .822628  |
|             | var (e.kY27PWB6)              | .7177236 | .0275779 |       |       | .665657  | .7738627 |
|             | var (e.kY27PWB7)              | .6188426 | .0280551 |       |       | .5662277 | .6763465 |
|             | var (e.kY27PAR1)              | .7688841 | .0273628 |       |       | .7170816 | .824429  |
|             | var (e.kY27PAR2)              | .5442623 | .0296764 |       |       | .4890979 | .6056486 |
|             | var (e.kY27PAR3)              | .4860311 | .028923  |       |       | .432524  | .5461574 |
|             | var (e.kY27PAR4)              | .6270456 | .029491  |       |       | .5718283 | .6875948 |
|             | var (e.kY27PAR5)              | .5755881 | .0296002 |       |       | .5204007 | .636628  |
|             | var (e.kY27PAR6)              | .6756523 | .0292414 |       |       | .6207036 | .7354653 |
|             | var (e.kY27PAR7)              | .7394872 | .0283268 |       |       | .6860006 | .7971442 |
|             | var (e.kY27SOC1)              | .6102471 | .0298918 |       |       | .5543848 | .6717385 |
|             | var (e.kY27SOC2)              | .4179261 | .0290453 |       |       | .3647055 | .4789132 |
|             | var (e.kY27SOC3)              | .468299  | .0294246 |       |       | .4140376 | .5296718 |
|             | var (e.kY27SOC4)              | .5967167 | .0297112 |       |       | .5412351 | .6578857 |
|             | var (e.kY27SCH1)              | .3932546 | .027516  |       |       | .3428588 | .451058  |
|             | var (e.kY27SCH2)              | .4370135 | .028313  |       |       | .3848998 | .4961831 |
|             | var (e.kY27SCH3)              | .6178775 | .0297606 |       |       | .5622165 | .6790492 |
|             | var (e.kY27SCH4)              | .6833519 | .0289499 |       |       | .628903  | .7425148 |
|             | var (PHYSICAL)                | 1        | .        |       |       | .        | .        |
|             | var (PSYCHOLOGICAL)           | 1        | .        |       |       | .        | .        |
|             | var (AUTONOMY)                | 1        | .        |       |       | .        | .        |
|             | var (SOCIAL)                  | 1        | .        |       |       | .        | .        |
|             | var (SCHOOL)                  | 1        | .        |       |       | .        | .        |
| <hr/>       |                               |          |          |       |       |          |          |
|             | cov (e.kY27PWB4, e.kY27PWB5)  | .2709651 | .0313604 | 8.64  | 0.000 | .2094998 | .3324303 |
|             | cov (e.kY27PWB4, e.kY27PWB6)  | .2324874 | .0322542 | 7.21  | 0.000 | .1692703 | .2957044 |
|             | cov (e.kY27PWB5, e.kY27PWB6)  | .2409621 | .0321368 | 7.50  | 0.000 | .1779752 | .303949  |
|             | cov (e.kY27PAR6, e.kY27PAR7)  | .3917683 | .0296076 | 13.23 | 0.000 | .3337384 | .4497981 |
|             | cov (PHYSICAL, PSYCHOLOGICAL) | .6660461 | .0260638 | 25.55 | 0.000 | .614962  | .7171302 |
|             | cov (PHYSICAL, AUTONOMY)      | .481117  | .0333603 | 14.42 | 0.000 | .415732  | .5465019 |
|             | cov (PHYSICAL, SOCIAL)        | .5067377 | .032729  | 15.48 | 0.000 | .44259   | .5708854 |
|             | cov (PHYSICAL, SCHOOL)        | .5595735 | .0308489 | 18.14 | 0.000 | .4991108 | .6200362 |
|             | cov (PSYCHOLOGICAL, AUTONOMY) | .7197018 | .0242999 | 29.62 | 0.000 | .672075  | .7673287 |
|             | cov (PSYCHOLOGICAL, SOCIAL)   | .7405352 | .0235106 | 31.50 | 0.000 | .6944553 | .7866152 |
|             | cov (PSYCHOLOGICAL, SCHOOL)   | .7970045 | .021023  | 37.91 | 0.000 | .7558002 | .8382088 |
|             | cov (AUTONOMY, SOCIAL)        | .6349417 | .0285453 | 22.24 | 0.000 | .5789939 | .6908895 |

.872 .023  
.2071 .0290



|                       |          |          |       |       |          |          |
|-----------------------|----------|----------|-------|-------|----------|----------|
| cov(AUTONOMY, SCHOOL) | .6381337 | .028287  | 22.56 | 0.000 | .5826921 | .6935753 |
| cov(SOCIAL, SCHOOL)   | .6616647 | .0278346 | 23.77 | 0.000 | .60711   | .7162194 |

LR test of model vs. saturated: chi2(310) = 707.88, Prob > chi2 = 0.0000

6 . estat gof, stats(all)

| Fit statistic        | Value     | Description                              |
|----------------------|-----------|------------------------------------------|
| Likelihood ratio     |           |                                          |
| chi2_ms(310)         | 707.881   | model vs. saturated                      |
| p > chi2             | 0.000     |                                          |
| chi2_bs(351)         | 9408.677  | baseline vs. saturated                   |
| p > chi2             | 0.000     |                                          |
| Population error     |           |                                          |
| RMSEA                | 0.037     | Root mean squared error of approximation |
| 90% CI, lower bound  | 0.033     |                                          |
| upper bound          | 0.041     |                                          |
| pclose               | 1.000     | Probability RMSEA <= 0.05                |
| Information criteria |           |                                          |
| AIC                  | 57957.382 | Akaike's information criterion           |
| BIC                  | 58417.538 | Bayesian information criterion           |
| Baseline comparison  |           |                                          |
| CFI                  | 0.956     | Comparative fit index                    |
| TLI                  | 0.950     | Tucker-Lewis index                       |
| Size of residuals    |           |                                          |
| SRMR                 | 0.033     | Standardized root mean squared residual  |
| CD                   | 0.998     | Coefficient of determination             |

7 .
